# Supplementary material for: A hypomorphic variant in EYS detected by genome-wide association study contributes toward retinitis pigmentosa
Source: PubMed Central journal article supplement (PMC7846782; doi:10.1038/s42003-021-01662-9), 2021-01-29
Supplement: 42003_2021_1662_MOESM3_ESM.pdf [file 42003_2021_1662_MOESM3_ESM.pdf]

## **Description of Additional Supplementary Files**

**File name:** Supplementary Data 1

**Description:** Source data for Figure 4h and 4q. For measuring *ey*s mRNA expression by quantitative RT PCR, Ct values for *ey*s were normalized against those for *gapdh*. Data for SPMO1, SPMO2, and SPMO3 were further normalized against that for ContMO (Figure 4h). Number of cells with mislocalized rhodopsin within a retinal section was counted (Figure 4q).
